# Supplementary material
Source: publisher site journal article supplement (https://www.degruyterbrill.com/publication/dbid/inso/downloadAsset/INSO_INS%20Example%20Article.docx)
Supplement: Supplementary file 1 [file INSO_INS%20Example%20Article.docx]

De Gruyter

Ideologies in National Socialism – Article template

How to use this template

This is a pre-structured Word template for INS articles (starting on page 2).

- Start by replacing the text [Enter title here] with your article’s title
- Continue to write your text in the appropriate sections (Keywords, Summary, Article Text)
- If you copy text from other sources, make sure to copy the text without styles
- Make sure to delete the sample text in the entry structure
- Save the document as docx-file

Please check the [style guide](https://www.degruyter.com/publication/dbid/INSO/downloadAsset/INSO_INS%20Style%20Sheet.pdf) for detailed instructions on questions regarding style and format , and download the sample entry to see how the final manuscript should look like.

Styles and structure

You can find all our pre-defined “Styles” in the Author tab or the start tab menu above. The structure of the entry should not be changed.

- Make sure to use the defined styles (marked by the colour code on the left side of the text), especially if you copy and paste content from other sources.
- If you have accidentally deleted the style of a section, mark the text, and assign the appropriate style.
- The text of your entry should usually be styled as paragraph (grey line), while keywords and summary have distinct styles.
- Headings on level 1 (head1, green) and subheadings (head2, lighter green) can be added when needed
- Relevant persons can be highlighted as index terms (orange)

General instructions

The title and length of your article are given in the email with the subject “Ideologies in National Socialism (INS) | Invitation to write an article”.

Please send your finished manuscript to the Editorial Office: **[eo@ns-ideologies.org](mailto:eo@ns-ideologies.org)**

Your entry will be briefly checked, converted into XML and uploaded into De Gruyter’s Content Management System (CMS). All further editing will be done within the CMS.

Contact

If you have any questions, please contact the Editorial Office: [eo@ns-ideologies.org](mailto:eo@ns-ideologies.org)

Castles in the Air: The Reichsluftschutzbund and “Total Mobilization” in Nazi Germany

Keywords

Reichsluftschutzbund | air protection | Volksgasmaske | Die Sirene | total mobilization

Summary

Founded in April of 1933, the *Reichsluftschutzbund* (Reich Civil Defense League or RLB) was a federal organization charged with the protection of German civilians from aerial attack. This article will detail the creation, structure, and activities of the RLB to evaluate its role in the production of ideology. Focusing on the RLB’s publication, *Die Sirene,* and its air raid drills, the article argues that the RLB was an important site for producing visions of “total mobilization” and civic militarization in the 1930s. However, it is difficult to assess the reception of these ideas among the German populace. While the RLB achieved high membership numbers, a wide readership for *Die Sirene,* and reach into the domestic lives of regular Germans, ego documents from the period reveal regular disregard or distaste for the organization’s guidelines. This likely reveals that dreams of “total mobilization” and civic militarization simply had their limits in real-world application. This became increasingly apparent in the marginalization of the RLB during the bombing raids that eventually ravaged German cities in the early 1940s.

​Introduction

On April 29, 1933, the Nazi state announced the creation of the *Reichsluftschutzbund*, a voluntary organization that would centralize and nationalize civilian protection against air attack. Commonly translated into English as the Reich Civil Defense League or simply denoted as the RLB, the *Reichsluftschutzbund* was subordinated to Hermann Göring’s newly created Ministry of Aviation.

By the end of 1933, the RLB enjoyed a membership of one million Germans, and by the following summer, 2.5 million more had joined the ranks.[[1]](#footnote-1) Three years later, the RLB boasted 8.2 million members in over 7,000 local branches, making it one of the largest civic organizations in Nazi Germany. Putting its membership into perspective, historian Peter Fritzsche writes that the total number included, “one out of every six Berliners and over 10 percent of Germans living in Hesse, the Palatine, and Baden…As many as 350,000 block wardens surveyed the civil vigilance of their neighbors.”[[2]](#footnote-2)

Given the sheer size of the RLB in the 1930s, it would seem like an ideal venue in which to express and inculcate Nazi ideology. And, indeed, the RLB was extremely useful in dramatizing Nazi ideals like a “totally mobilized” *Volksgemeinschaft.* According to some historians, it was precisely this creation of a militarized collective that defined the Nazification of regular Germans.[[3]](#footnote-3) Through their cooperative performances and rhetoric, organizations like the RLB offered Germans the sense of a renewed national life at the cost of the continual reminder that collective struggle might end in death and destruction. In the RLB’s case, this was the reminder that Germany could (and ultimately would) be attacked by the bomber.

This article will cover the two major media through which the RLB dramatized this idea, namely print culture and collective performance. After detailing the history that led to the creation of the RLB and laying out its structure, the article will focus on the RLB’s popular magazine, *Die Sirene.* Through the pages of *Die Sirene,* the RLB attempted to fetishize the technology of flight, turning it into a commodity that could be enjoyed as a constituent part of modern life while simultaneously acculturating viewers/readers to militarized violence. The article will then turn to the RLB’s performative activities that tried to turn regular Germans into “air-minded” citizen-soldiers, ready to protect the totally mobilized Reich. In attempting to produce a carefully choreographed ballet (or perhaps more accurately a military parade) through public demonstrations like air raid drills and classes, RLB ideologues could argue that they were helping to protect individual German civilians while simultaneously encouraging them to commit themselves to a collective community of national protection.

To conclude, the article will describe who constituted this imagined collective community. While the RLB was not a major site for Nazi racial ideology, exclusionary aspects of their air protection community would fall along predictable racial, ethnic, and national lines. The relatively large number of female air raid wardens in late 1930s offers an avenue for exploring the ways in which the RLB did not fully adhere to broader strains of Nazi ideology, particularly gender norms. Finally, in covering the RLB’s perceived difficulties in the 1940s, the article surveys the limits of its ideological reception among German civilians and the methodological difficulties inherent in producing such a reception history.

Prehistory and Rationale

While the Nazis suggested that the *Reichsluftschutzbund* was created ex nihilo in 1933, it was at least partly predicated on earlier organizations and long-term political desires. After signing the Treaty of Versailles on June 28, 1919, Germany was required to substantially reduce its standing armed forces, including a complete dissolution of its air force.

This was troubling because the final year of World War I had revealed to both military men and politicians that mechanization had indeed changed the face of war. Machine guns and barbed wire had bogged down the fighting on the Western Front for three brutal years; tanks, submarines, and airplanes began to re-mobilize the front in 1918. As they transitioned from reconnaissance tools to combat weapons, airplanes particularly captured the imagination of fighting men, military theorists, and eventually the general public. Once new airplane technologies allowed for both bombing and aerial dogfights, flying aces like Manfred von Richthofen, Billy Bishop, and even Hermann Göring became mythic figures and/or public idols.

While dogfights may have held greater romance, bombing would have far greater historical implications. Military theorists quickly recognized that aerial bombing troubled the concept of enemy lines. The Italian General Guilio Douhet’s 1922 publication, *The Command of the Air,* made this claim explicit by stating that air power opened a third dimension on the battlefield that allowed attacking forces to entirely skirt land defenses. Douhet further argued that complete defense against aerial attack was essentially impossible, and thus, aerial dominance would determine the outcome of all future wars.[[4]](#footnote-4) Such pronouncements were reaffirmed by numerous interwar prognosticators, including the English military theorist Basil Liddell Hart and PM Stanley Balwin, whose famous 1932 speech to Parliament insisted that “the bomber would always get through.”[[5]](#footnote-5)

Given that Germany had lost its air force and was geographically proximate to several world powers, it felt particularly susceptible to a future aerial attack. Throughout the 1920s, German militarists sought ways to subvert the Treaty of Versailles and agitate for aerial rearmament. Advocacy for national protection was generally funneled through several private air protection clubs. For instance, the *Verein ehemaliger Angehöriger der Flugabwehr e. V.* (The Association of Former Members of the Air Defense) was created in 1921 to educate the German public on air defense.[[6]](#footnote-6)

Air restrictions relaxed after the 1926 Paris Air Agreement through which Germany was granted the ability to resume commercial air travel and control their own air space.[[7]](#footnote-7) The agreement further allowed Germany to set up a military air defense service in 1927. Civil defense measures were handed over to the Ministry of the Interior, which tended to coordinate with private air organizations like the *Deutscher Luftschutz e.V.* (The Association for German Air Defense), the Flakverein, and the Ring of Fliers in order to conduct small-scale air defense exercises and consider best practices.

Due to a lack of federal funding, the Ministry of the Interior was unable to create a government service solely dedicated to civilian air protection. Beyond working with private air organizations, they put air defense responsibilities in the hands of preexisting police, firefighters, and ambulance services. In this decentralized world, men with backgrounds in aviation and aviation science began to fashion themselves as technical experts. In the pages of technical journals like *Die Luftwacht* (The Air Watch) and *Luftschutz Nachrichtenblatt* (Air Raid News Bulletin), men like Erich Hampe began to discuss best practices for aerial protection. While not uncommon among his peers, Hampe particularly insisted that Germany needed to do more to prepare itself for future aerial warfare. In 1931, after attacking what he saw as the lack of political action to create more air defense measures, Hampe wrote: “Civil air defense is not a military or political matter, but a self-evident act of affirming and protecting life. All people are threatened by the danger of aerial attack.”[[8]](#footnote-8)

Hampe’s sense of urgency reached the German public through slew of air attack novels, journalistic coverage of foreign air forces, and newspaper op-eds on the state of German defense. For instance, in 1932, an unnamed engineer wrote a letter to the state authorities in Baden-Württemberg claiming that, “[aerial warfare] is the most important issue of all, as aircraft pose a real mortal danger to all those people who are quietly asleep, trusting in the effectiveness of international treaties, which *will* fail to protect them.”[[9]](#footnote-9) The engineer went on to boldly assert that French aerial attacks could kill 600,000 Germans in a single day. The German authorities knew this, he claimed, but chose to do nothing.

Creation and Structure

It was precisely this sense of national vulnerability that the Nazis attempted to equally sensationalize and quell with the creation of the *Reichsluftschutzbund* in 1933*.* Beyond the fact that a centralized civilian air defense program would presumably create the sense that the Nazis cared about the safety of German citizens, any political platform that thumbed its nose at the Treaty of Versailles would likely allow or even encourage national rearmament. The salient point here is that, from its inception, the RLBwas intended to convey a sense of national protection that fit within broader Nazi geopolitical views.

Like the engineer in Baden-Württemberg who fretted over foreign incursion in German airspace, the minds behind the creation of the RLB regularly relied on catastrophic thinking. In their public-facing messaging, they continually implied that a second, more mobile war was imminent, and that Germany needed to ready itself for the bomber. But beyond a mere military concern, aerial warfare was a problem for soldiers and civilians alike. As such, the RLB and its supporters routinely pulled on both the zero-sum geopolitics of contemporary thinkers like Carl Schmitt and the concept of “total mobilization” made popular by Ernst Jünger and other military men.[[10]](#footnote-10) Given that the bomber could theoretically strike at any moment and place, all Germans would need to be honed into component parts in the mechanized and militarized nation.[[11]](#footnote-11)

The ideological advantage of this situation was its potential to bind the nation together in the face of catastrophe; this might prevent what many contemporaries saw as the failures of the home front in World War I. On the other hand, organizations like the RLB now had to figure out how to best fulfill this ideological dream while considering the practical matter of military protection for civilians.

After their swift rise to political power, the Nazis moved quickly in consolidating and building up Germany’s air power. On January 30, 1933, Hitler appointed Göring Reich Commissioner for Air Transport. Over the next four months, Göring’s office would become part of the Reich Ministry, taking over the leadership of all aerial concerns, including the newly formed Luftwaffe. Göring would then assign Bruno Loerzer, Josef Seydel, and Erich Hampe to create a nationalized civilian air defense organization.[[12]](#footnote-12)

Loerzer, a former World War I flying ace and Freikorps member, was one of Göring’s drinking buddies. Seydel, a long-time political organizer, was clearly brought on to structure membership and coordinate activities with the SA. Erich Hampe, the Deputy Chief for the *Technische Nothilfe* (Technical Emergency Corps) since 1920, would provide his specialist knowledge to set guidelines and best practices for civilian air protection. Indeed, Göring had no intention of personally running what would become the RLB. Rather, the former Flak artillery officer, Hugo Grimme, would serve as RLB president.[[13]](#footnote-13) Göring would largely function as a figurehead, granting the organization significant protection from polycratic struggles within the Nazi Party. In fact, Göring’s first RLB speech demanded the dissolution of all Weimar-era private air protection organizations.[[14]](#footnote-14) The RLB would now be the sole air defense organization for Germany, answering directly to Göring and, by extension, Hitler.

On June 24, 1933, the RLB dropped leaflets over Berlin, inaugurating a nationwide campaign to teach “air readiness.” The leaflets made it clear to Germans that paper was falling on them now, but it would soon be bombs.[[15]](#footnote-15) That summer, the SA and the Hitler Youth conducted more leaflet bombings, informational campaigns, and funding drives across the country.[[16]](#footnote-16) This work resulted in high initial membership numbers, and RLB offices began to pop up in major cities.

As the league grew, it was divided into fifteen regional groups that oversaw approximately 66,300 local district departments and 644,000 public officials.[[17]](#footnote-17) Local RLB wardens each controlled their own “air-defense sector” in which they were expected to direct police and fire brigades in the event of an attack. Furthermore, each city apartment building was supposed to elect a “house warden” who would then assign a fire detail for their individual building. House wardens reported to block wardens, who then sent information up the extensive chain of command.[[18]](#footnote-18)

Nationwide activities continued into the 1930s, as posters, pamphlets, and dummy bombs began to decorate German cities.[[19]](#footnote-19) Larger RLB shows like “Kiel in Flames” featured firefighters rescuing actors from a burning wooden town followed by the throwing of tear gas grenades into the crowd of spectators.[[20]](#footnote-20) One American observer of these activities claimed that “Military preparedness…pervades every aspect of life in modern Germany...Every house bears the placards of an organization for defense against air attack. The language of the street, the press, the radio, the newsstand and even the library and classroom smacks of war.”[[21]](#footnote-21)

Beyond public demonstrations, the RLB donated significant time and resources to classroom education. RLB officials visited schools in order to lecture both children and adults, often leaving behind literature that encouraged teachers to integrate civil defense throughout the curriculum. For instance, common math questions asked students to calculate the trajectories and explosive power of various bombs and bullets, while writing assignments asked for reflections on blackout measures.[[22]](#footnote-22) Additionally, the RLB ran 5,088 of their own air raid protection schools with 28,000 teachers across Germany. After the passage of the Air Raid Protection Act on May 26, 1935, anyone could be compelled to participate in these training courses. Germans who disobeyed RLB ordered could receive fines or imprisonment.

At its peak, in 1939, the RLB maintained about 15 million members and 75,300 offices nationwide. Despite its great reach across the German populace, the league had little to say about the racial ideology that so often defines Nazi Germany in popular consciousness. Instead, the league focused on inspiring (or enforcing) collective air protection through large-scale social programming. The work of historians Peter Fritzsche, Bernd Lemke, and Dietmar Süß as well as the more recent turn to the study of visual pleasure in the Third Reich has led scholars to increasingly recognize the importance of organizations like the RLB for the militarization of the German populace. One important site for this militarization was the RLB’s bi-monthly publication, *Die Sirene.*

The Visual Pleasure of Air Protection Technologies

*Die Sirene: Illustrierte Zeitschrift mit den Mitteilung des Reichsluftschutzbundes* (*The Siren: Illustrated Journal with Communications from the RLB)*, published from 1933 to 1944 by Deutscher Verlag, became one of the most popular magazines in the Third Reich.[[23]](#footnote-23) From its inception, *Die Sirene* aimed for mass popularity, assuming that a wide readership would help to impart the seriousness of civilian air protection across Germany.

To garner readership, the magazine read like a general illustrated, featuring recurring history sections, short stories, comics, and classifieds. Admittedly, these histories, stories, and comics tended to focus on warfare, and the classifieds donated significant space to consumer items like gas masks and personal air raid shelters. But the general tone of *Die Sirene* in the 1930s was not one of panic or grief.

Rather, much like aerial technology magazines in other nations, *Die Sirene* attempted to package air protection as an exhilarating consumer item. Glossy photographs of modern military technologies crowded the pages, attempting to sweep the viewer away with their sleekness and speed. Juxtaposing photos of tanks and submarines against drawings of Frederick the Great and the mythical hero Siegfried, the magazine simultaneously created a sense of German military continuity as well as an appreciation for the new epoch into which the Nazis had ushered the nation.[[24]](#footnote-24) In fact, a publicity photo from 1934 depicted a knight in shining armor and a papier-mâché dragon standing next to Hitler Youth members in gas masks. One boy holds a sign that reads: “The dragon: The Air Force of the Middle Ages.”[[25]](#footnote-25)

Not surprisingly, photographs and realistic drawings of airplanes were the magazine’s ultimate draw. A sense of speed and connection intended to convey the value of air travel for peaceful national purposes. At the same time, *Die Sirene* did not shy away from the airplane’s wartime possibilities. Through World War I stories and the republished writings of interwar military theorists, the magazine warned Germans of the bomber’s imminent arrival. The RLB’s overarching assertion, however, was that preparation and determination could overcome this threat. German identification with the airplane could prefigure the “total mobilization” that would be necessary to survive (and even possibly thrive) in the war to come.[[26]](#footnote-26)

In selling this dream, *Die Sirene* pitched air protection much like other “people’s products” such as the *Volkswagen* and the *Volksempfänger.*[[27]](#footnote-27)This tactic particularly accelerated after the RLB’s 1937 launch of the *Volksgasmaske* (or People’s Gas Mask), which all German civilians were encouraged to purchase at a price of 5 Reichsmark. Made of flimsy rubber due to high production costs, the *Volksgasmaske* was clearly an attempt to publicize visible steps towards national protection, rather than a particularly viable means for surviving aerial bombardment. In this sense, the RLB was engaged with a common practice of ideological messaging in the Third Reich. Packaging ideas like “total mobilization” to the German people was clearly more effective when couched as a means of enjoyment or consumption, even when fear lurked behind the purchase.[[28]](#footnote-28)

The Military Parade: Performing National Collectivity

Acerbically commenting on the gas mask’sconsumer appeal, the pacifist Wilhelm Lamszus wrote, “Thousands of fathers and mothers have bought this indispensable piece of equipment for young and old alike, and last Christmas the gas mask was successfully pitched as the gift of the year.”[[29]](#footnote-29) Given that Lamszus saw gas masks as physical signs of rearmament, the fact that this comment is hyperbolic should not be surprising. Indeed, while the *Volksgasmaske* was pitched by the RLB as a desired consumer object, it was never given the level of customization of the British or American masks.

Most likely, this was primarily due to German material shortages and production delays. But, in an attempt to spin it to their advantage, the RLB proclaimed the standard black mask as a fitting symbol of the German nation. No citizen would receive precedence or special treatment in the Third Reich; rather, the *Volksgasmaske* would bind the German people together in their collective duty to the larger community of air protection. With identical masks donned, all Germans would look alike as they struggled for survival.

The idea of a totally mobilized collective air raid community was predicated on the work of Erich Hampe and like-minded air protection specialists. During the Weimar period, technical specialists assumed that civilians could not be effectively trained in air protection. They claimed that women would act hysterically, children would lag behind, and the elderly simply could not meet the physical demands of an air raid.[[30]](#footnote-30) However, reflecting on the failures of Weimar-era air raid drills, Hampe now argued that *all* civilians should be given air and gas protection duties, regardless of their age or gender. According to Hampe, a sense of responsibility and collectivity could fortify all Germans and weave them into a social fabric that could best withstand aero-chemical attacks.[[31]](#footnote-31)

Consequently, the RLB began to produce literature and training that assigned each citizen with their own individual protection. After individual protection was ensured, German civilians were then intended to assist their children, neighbors, and broader communities. As a performative reflection of this structure, a civilian was supposed to put on their own gas mask before helping others put on theirs. Such attempts to produce a self-sufficient yet socially integrated German subject inspired disparate RLB slogans like “Air Protection is Self-Protection” and “One People, One Danger, One Defense.”

Many Germans practiced these guidelines in the intimacy of the home. Apartment “house wardens” conducted regular drills in which building dwellers would be alerted to an imaginary aerial attack. They would be expected to immediately locate their gas mask and hold their breath as they pulled it over their heads. Once a gas-tight fit was ensured, they could begin to gather with their family and neighbors to descend to the building’s basement with the warden in tow. While some newer apartment buildings featured reinforced bomb shelters, most basements had little to architecturally distinguish their new protective role. Instead, residents would furnish them with flashlights, shovels, blankets, and any other provisions deemed necessary for short-term survival.[[32]](#footnote-32)

Public demonstrations were conducted at work and through city or neighborhood-wide air defense drills. For instance, in a special air defense exhibition in Karlsruhe, marked planes from the local flying club flew over the city in six separate waves. Once the planes were detected from the ground, various pre-selected industrial firms set off their air raid sirens. Citizens then closed their windows and doors to protect against imaginary shrapnel and filed into apartment-building basements. Police officers ushered people out of the street and into public shelters as the planes began to drop red smoke canisters on the city.[[33]](#footnote-33)

RLB officials and air protection specialists knew that all these preparations ran the risk of sending German civilians into a panic. In fact, many air protection specialists disagreed with the RLB’s choice to issue the *Volksgasmaske* to civilians, claiming that it did more to frighten civilians who did not have sufficient composure to correctly employ the mask.[[34]](#footnote-34)

To counter potential failures, the RLB walked a fine rhetorical line, relying on descriptions of collective hardness and resiliency to bolster the psychological resistance of German civilians. Frequently, RLB literature described the “iron will” of the German people and their undeniable desire to survive.[[35]](#footnote-35) This *Lebenswille* or “will to live” attempted to create a sense of agency and hope predicated on the collective strength of the German people. To this end, the RLB regularly touted its voluntary nature and its membership numbers, thereby making it difficult for the historian to separate propaganda from reality when assessing the appeal of the RLB’s collective vision.[[36]](#footnote-36)

Likewise, air raid drills and gas mask distribution were more than mere attempts at technical protection from air attack. In fact, given the doubts of air protection specialists about the utility of gas masks, there is reason to believe that the RLB and the Nazi Party valued these exercises more for their ideological value. The hope was that millions of Germans in identical black gas masks, performing organized and sometimes choreographed drills, would instill feelings of collectivity and strength that could ward off panic or fear. In fact, Peter Fritzsche claims that the gas mask was the ultimate symbolic artifact of Nazi Germany because it “acknowledges the extreme jeopardy of the moment, but holds out the possibility of survival as long as the wearer enrolls in the stern regimen of uniformity and discipline, ready for the relentless onslaughts and murderous counterattacks.”[[37]](#footnote-37)

To this end, the RLB (according to the wishes of the Nazis) insisted that the German people would never evacuate in the event of an air raid. Unlike the French, whose evacuation plans were seen as a representation of the population’s lack of fortitude, the Germans could bind together in the face of danger.[[38]](#footnote-38) This would only continue the performative militarization of collective life that ostensively entreated German civilians to bear the violence of war.[[39]](#footnote-39)

Conclusions: Historical and Analytical

Detailing the RLB’s attempt to militarize and collectivize all German civilians raises three concluding questions that will be addressed in order. First, did the RLB communicate any of the Nazi Party’s other commonly circulated ideas? Second, how successful was the RLB’s attempt to militarize the German populace? And third, did the RLB hold fast to these ideas throughout its existence?

For historians who believe that the popular appeal of Nazism lay in its call for a newly modern national collective (or a renewed *Volksgemeinschaft*), the RLB undoubtedly conveyed Nazi ideology. But the league rarely promoted supplementary ideas often seen as definitional for Nazism. Yes, *Die Sirene* was festooned in the iconography of the Third Reich, but the articles tended to focus on popular pastimes, hobbies, and technical knowledge. The real emphasis was on futurist and fascist aesthetics.

Undoubtedly, zero-sum geopolitics ungirded the RLB’s call for both individual and national protection, but public facing material did not address or explain these Schmittian assumptions. The organization also had little to say about *Blut und Boden,* Bolshevism, race, and/or foreign conquest. *Die Sirene* lauded the Wehrmacht in the early war years, but this coverage was largely focused on military equipment and the responsibilities of the home front.

It was national belonging that was continuously and markedly inscribed in the RLB’s public activities. For instance, Jews, Roma, political dissidents, and other groups that the Nazis did not see as part of their imagined *Volksgemeinschaft* were generally barred from participating in national air protection activities after 1934.[[40]](#footnote-40) A 1937 Air Defense Law officially stated that no Jew would serve as a state recognized air warden and that the *Volksgasmaske* was only to be sold to German citizens.[[41]](#footnote-41) As such, technologies of protection like the gas mask and the air raid shelter became physical expressions of both national belonging and exclusion. According to this logic (both explicit and implicit), the Germans, with their collective fortitude and technological aptitude, would survive the coming cataclysm; everyone else’s existence was uncertain.

While largely a matter of practical necessity, the RLB actively worked against the gender ideals that were foundational for the Nazi Party. Rather than encourage German women to stay home and raise the next generation of National Socialists, the RLB put women to work. Due to the reintroduction of male conscription in 1935, 280,000 women became the heroines of local air protection.[[42]](#footnote-42) This number made up about 34 percent of all RLB’s officials, and in some localities up to 50 percent served as block wardens, members of local fire brigades, and apartment building caretakers.[[43]](#footnote-43) Indeed, the head of RLB propaganda, Otto Teetzman, wrote in 1935: “A very important part of the protection tasks must rest on the shoulders of women. Accordingly, every German woman who is physically fit, must be incorporated and trained [in the RLB].”[[44]](#footnote-44)

Nevertheless, the rhetoric of motherhood still permeated the RLB’s attempt to turn women into the protective caregivers of the air raid community. Faced with even greater reliance on female labor during the war, officials argued that women were more likely to provide civilians (particularly children) with reassurance and succor in moments of attack.[[45]](#footnote-45) Nevertheless, through the RLB, young women were offered new responsibilities, new freedoms, and new power in the civic realm. This would lead to a certain level of public recognition, although the broader Nazi Party never expressed much interest in the RLB, and women’s share of home-front service medals was limited to 5 percent.[[46]](#footnote-46)

Assessing recognition for the RLB’s work provides an admittedly imperfect reception history of the league’s activities and ideas. Throughout the bombing campaigns of World War II, the RLB tended to receive praise from German civilians, even as the Nazi Party took on more responsibility for emergency services.[[47]](#footnote-47) This was probably predicated on the localized relief that RLB wardens could provide in the aftermath of an attack. In essence, the horrors of bombing did produce something of a “community of fate” in which the RLB was one of the few resources available.

At the same time, regardless of their propagandistic assertions, it remains doubtful that the RLB was able to fully militarize the civilian population. Ego documents from the war reveal that many civilians resented the intrusion of air raid drills into daily life.[[48]](#footnote-48) While the 1935 Air Defense Act made it illegal to disregard air raid drills, plenty of civilians disobeyed. Air wardens regularly found people who failed to close their windows and turn off their apartment lights as well as those who elected not to make their way to an air raid shelter during a drill. Further still, the percentage of civilians who always carried their gas mask, as per RLB instructions, remained low. This does not necessarily mean that regular Germans resisted the RLB or that they did not engage in the broader militarization of the nation. Rather, it reveals the sheer difficulty of a true “total mobilization,” one that reached into and remolded every aspect of civilian lives.[[49]](#footnote-49)

When the bombing war accelerated in 1941, RLB gas mask guidelines were still further disregarded. Indeed, the Allied bombing campaign, with its lack of poison gas bombs, made the distribution of the *Volksgasmaske* seem absurd. Not only had the RLB failed to provide all Germans with a gas mask due to production and distribution problems, but firebombing could potentially asphyxiate anyone wearing a gas mask in an enclosed space.[[50]](#footnote-50) After 1941, urgent air raid questions flooded the offices of *Die Sirene,* which appeared with reduced frequency until the magazine’s closure in 1944. The RLB and the Nazis began to reconsider evacuations as the dream of total civilian militarization, and by extension total civilian protection, transformed into a living nightmare.[[51]](#footnote-51)

Coda

There is one final methodological approach that is worth discussing in the attempt to understand the ideological importance of the RLB in Nazi Germany. In correctly noting that the RLB was part of a transnational culture of interwar air protection, historian Sheldon Garon has advocated for comparative scholarship.[[52]](#footnote-52) In contrast to Bernd Lemke, who claimed that the RLB’s distinction lay in an authoritarian structure based on the adherence to a *führer*, Garon does not see substantial ideological difference across German, Japanese, and British air protection activities. In fact, Garon suggests that authoritarian measures would have escalated in Britain if German bombing had not slackened after 1941. And even when we look to a nation like United States, far removed from the European theater, we see the government place Hawaii under strict martial law and conduct regular, mandator air raid drills in an attempt to protect against future Japanese attacks.

While this questions the uniqueness of the RLB, it does not change our understanding of the organization’s role in Nazi Germany. In an attempt to militarize all German civilians, the RLB staged and dramatized a community of national protection. Nazi and RLB leaders hoped that the league’s offers of belonging and technological protection would be able to overcome panic, fear, and social dissolution in the face of war. Thus, on the page and in the streets, the RLB produced propaganda that was aimed at fortifying the average German and entering them into a fully armored *Volksgemeinschaft*. There is no doubt that such militarization was important for producing the Nazi subject in the 1930s, but questions remain over just how definitional and durable this process was.

1. Peter Fritzsche, *A Nation of Fliers: German Aviation and the Popular Imagination* (Cambridge MA: Harvard University Press, 1992), 211. [↑](#footnote-ref-1)
2. The RLB also operated 5,088 air raid protection schools with 28,000 air protection teachers. Generalmajor a.D. von Tempelhoff, “Chemische Kampfmittel und Gasabwehr in der ‘Russischen Felddienstordnung!’” *Gasschutz und Luftschutz* 1 (August 1938) [↑](#footnote-ref-2)
3. Peter Fritzsche, *Life and Death in the Third Reich* (Cambridge MA: Belknap Press, 2008), 4. [↑](#footnote-ref-3)
4. Giulio Douhet, *The Command of the Air*, trans. Dino Ferrarri (Washington DC: Air Force History and Museums Program, 1998), 6. [↑](#footnote-ref-4)
5. Stanley Balwin, “A Fear for the Future,” November 10, 1932, https://missilethreat.csis.org/wp-content/uploads/2020/09/A-Fear-for-the-Future.pdf. [↑](#footnote-ref-5)
6. Bernd Lemke, *Luftschutz in Grossbritannien Und Deutschland 1923 Bis 1939* (München: Oldenbourg Verlag, 2005), 125-126. [↑](#footnote-ref-6)
7. Germany was able to obtain this concession by restricting other nations’ planes from landing and fueling at important airports. [↑](#footnote-ref-7)
8. *Luftschutz Nachrichtenblatt* 1 (January 1931), 15-16. [↑](#footnote-ref-8)
9. Gesuch des Oberingenieurs Karl Leuprecht in Karlsruhe Luft und Gasschutz betreffend, 1932 (Landesarchiv Baden-Württemberg-Generallandesarchiv Karlsruhe). [↑](#footnote-ref-9)
10. Ernst Jünger, *Die Totale Mobilmachung* (Berlin: Verlag für Zeitkritik, 1931). [↑](#footnote-ref-10)
11. Such interwar visions of the bomber tended to ignore the technologies limitations. Bombers still had important payload and fuel limitations in the 1920s and 1930s. [↑](#footnote-ref-11)
12. Nicole Kramer, *Volksgenossinnen an Der Heimatfront. Mobilisierung, Verhalten, Erinnerung* (Göttingen: Vandenhoeck & Ruprecht, 2011), 107. [↑](#footnote-ref-12)
13. Grimme would be followed as RLB President by Lieutenant General Karl von Roques in April 1936, General of the Anti-Aircraft Artillery Ludwig von Schröder in May 1939, General-Hauptluftschutzführer Hermann Sautier in June 1941, and General of the Anti-Aircraft Artillery Friedrich Hirschauer from August 1942 to January 1945. [↑](#footnote-ref-13)
14. *Amtliche Verlautbarungen Zum Luftschutz*, vol. 1 (Berlin: Verlag Gasschutz und Luftschutz, 1941). [↑](#footnote-ref-14)
15. Fritzsche, *A Nation of Fliers*, 208. [↑](#footnote-ref-15)
16. Dietmar Süß, *Death from the Skies: How the British and Germans Survived the Bombing in World War II*, trans. Lesley Sharpe and Jeremy Noakes (Oxford: Oxford University Press, 2011), 36-37. [↑](#footnote-ref-16)
17. Hugo Grimme, *Der Reichsluftschutzbund: Ziele, Leistungen Und Organisation* (Berlin: Junker und Dünnhaupt Verlag, 1936), 40. [↑](#footnote-ref-17)
18. Due to political infighting among Reich Ministries, it was not always clear who would command the emergency services in the event of an aerial attack on a German city. Regardless, the RLB always maintained control over civilian preparation for an air attack. Richard Overy, *The Bombing War: Europe 1939-1945* (London: Penguin, 2013), 413. [↑](#footnote-ref-18)
19. Edgar Winter, *Luftschutz Tut Not* (Berlin: Verlag des Vereins für soziale Ethik und Kunstpflege, 1933), 32. [↑](#footnote-ref-19)
20. In 1934 and 1935, these shows were viewed by 28 percent of the German population. Peter Fritzsche, *An Iron Wind: Europe Under Hitler* (New York: Basic Books, 2016), 43. [↑](#footnote-ref-20)
21. Fritzsche, *Life and Death in the Third Reich*, 55. [↑](#footnote-ref-21)
22. Richard J. Evans, *The Third Reich at War* (New York: Penguin, 2009), 435. [↑](#footnote-ref-22)
23. *Die Sirene* claimed to be the fourth largest 20-pfenning magazine in Germany. Paul Eduard Schriebl, “Der Luftschutz im Deutschen Reich von 1933–1945” (MA Thesis, Karl-Franzens-Universität, 2021), 40. [↑](#footnote-ref-23)
24. Peter Fritzsche, “Nazi Modern.” *Modernism/Modernity* 3, no. 1 (1996): 12. [↑](#footnote-ref-24)
25. *Die Sirene* no. 20 (August 1934) [↑](#footnote-ref-25)
26. Peter Fritzsche, “Machine Dreams: Airmindedness and the Reinvention of Germany,” *American Historical Review* 98, no. 3 (1993): 701. [↑](#footnote-ref-26)
27. Wolfgang König, *Volkswagen, Volksempfänger, Volksgemeinschaft: Volksprodukte im Dritten Reich: Vom Scheitern einer nationalsozialistischen Konsumgesellschaft* (Paderborn: Ferdinand Schöningh, 2004), 241, 286. [↑](#footnote-ref-27)
28. Pamela E. Swett, Corey Ross, and Fabrice d’Almeida. *Pleasure and Power in Nazi Germany* (New York: Palgrave Macmillan, 2011), 13; Shelley Baranowski, “Selling in the ‘Racial Community’: Kraft durch Freude and Consumption in the Third Reich” in *Selling Modernity: Advertising in Twentieth-Century Germany,* eds. Pamela E. Swett, Jonathan Wiesen, and Jonathan R. Zatlin (Durham: Duke University Press, 2007), 145-6. [↑](#footnote-ref-28)
29. Andreas Pehnke, *Der Hamburger Schulreformer Wilhelm Lamszus (1881-1965) Und Seine Antikriegsschrift “Giftgas Über Uns”: Erstveröffentlichen Des Verschollen Geglaubten Manuskripts von 1932* (Beucha: Sax Verlag, 2006), 131. [↑](#footnote-ref-29)
30. Failed air raid drills often reinforced this assumption. Even as late as 1938, a drill led to the panic dispersal of citizens in Hesse. Bernd Lemke, ed., *Luft- Und Zivilschutz in Deutschland Im 20. Jahrhundert*, 77. [↑](#footnote-ref-30)
31. Erich Hampe, “Technische Nothilfe und Luftschutz,” *Gasschutz und Luftschutz,* 1 (September 1931): 43. [↑](#footnote-ref-31)
32. Hermann Knell*, To Destroy a City: Strategic Bombing and Its Human Consequences in World War II* (Cambridge MA: De Capo Press, 2003), 281. [↑](#footnote-ref-32)
33. Major a.D. von Laer, “Schutz der Heimat: Die erste Lufschutzübung der Stadt Karlsruhe,” *Luftschutz-Rundschau* no. 6 (June 1933) [↑](#footnote-ref-33)
34. The RLB disregarded expert doubts about civilian gas masks and such dissention gradually disappeared from technical forums after 1937. [↑](#footnote-ref-34)
35. Walther Doering, *Luftschutz Und Gasschutz: Markbuch Für Den Wehrfähigen*, vol. 3 (Breslau: Völkischer Verlag Walter Uttikal, 1934), 8. [↑](#footnote-ref-35)
36. Kurt Knipfer, “Zum neuen Luftschutzgesetz,” *Gasschutz und Luftschutz* no. 7 (1935) [↑](#footnote-ref-36)
37. Fritzsche, “Nazi Modern,” 17. [↑](#footnote-ref-37)
38. Julia S. Torrie, *“For Their Own Good”: Civilian Evacuations in Germany and France, 1939-1945* (New York: Berghahn Books, 2010), 24-25. [↑](#footnote-ref-38)
39. Fritzsche, *Life and Death in the Third Reich*, 267. [↑](#footnote-ref-39)
40. Torrie, *“For Their Own Good,”* 129. [↑](#footnote-ref-40)
41. Süß, *Death from the Skies*, 38-39. [↑](#footnote-ref-41)
42. Jill Stephenson, *The Nazi Organization of Women* (London: Croom Helm, 1981), 206. [↑](#footnote-ref-42)
43. Nicole Kramer, “‘Kämpfende Mütter’ Und ‘Gefallene Heldinnen’ - Frauen Im Luftschutz,” in *Deutschland Im Luftkrieg*, ed. Dietmar Süß (Munich: Oldenbourg Verlag, 2007), 88-89. [↑](#footnote-ref-43)
44. Otto A. Teetzmann, *Der Luftschutz Leitfaden Für Alle* (Berlin: Verlag des Reichsluftschutzbundes, 1935), 94. [↑](#footnote-ref-44)
45. Kramer, “‘Kämpfende Mütter’ Und ‘Gefallene Heldinnen,’” 91. [↑](#footnote-ref-45)
46. Lemke, *Luftschutz in Grossbritannien und Deutschland,* 309.; Fritzsche, “Machine Dreams,” 706-707. [↑](#footnote-ref-46)
47. Fritzsche, “Machine Dreams,” 706.; Nicole Kramer, *Volksgenossinnen an Der Heimatfront. Mobilisierung, Verhalten, Erinnerung* (Göttingen: Vandenhoeck & Ruprecht, 2011). 154. [↑](#footnote-ref-47)
48. For just one of many examples, see: Karin Husmann, Es bleibt unsagbar... Zwei Kinder erleben das Inferno Dresdens 1945 und die Kriegs- und Nachkriegsjahre, 1999 (Deutsches Tagebucharchiv) [↑](#footnote-ref-48)
49. Roger Chickering, Stig Förster, and Bernd Greiner, eds., *A World at Total War: Global Conflict and the Politics of Destruction, 1937-1945* (New York: Cambridge University Press, 2005), 7. [↑](#footnote-ref-49)
50. Germans in rural areas rarely received gas masks. David F. Crew, *Bodies and Ruins: Imagining the Bombing of Germany, 1945 to the Present* (Ann Arbor: University of Michigan Press, 2017), 154. [↑](#footnote-ref-50)
51. The Allies officially dissolved the RLB in 1946 through the Control Council Directive No. 24. [↑](#footnote-ref-51)
52. Sheldon Garon, “Defending Civilians against Aerial Bombardment: A Comparative/Transnational History of Japanese, German, and British Home Fronts, 1918-1945,” *The Asia-Pacific Journal* 14, no. 23 (2016). [↑](#footnote-ref-52)
